# Supplementary material
Source: MDPI journal article supplement (https://www.mdpi.com/2073-8994/16/5/548)
Supplement: s1 [file s1]

## Supplementary Materials

Table S1. Weather conditions of the growing season of 2022 in comparison with long-term observations.

| Month  | Decade | Air temperatures, °C |                   |         |         | Precipitation, mm |                   | Sum of average daily air humidity deficits, hPa |
|--------|--------|----------------------|-------------------|---------|---------|-------------------|-------------------|-------------------------------------------------|
|        |        | average daily        |                   | maximum | minimum | 2022 г.           | long-term average |                                                 |
|        |        | 2022 г.              | long-term average |         |         |                   |                   |                                                 |
| May    | 1      | 11,0                 | 13,7              | 21,0    | 1,0     | 9,0               | 9,0               | 90                                              |
|        | 2      | 11,7                 | 15,4              | 19,0    | 5,0     | 41,0              | 9,0               | 40                                              |
|        | 3      | 13,8                 | 16,7              | 27,0    | 3,0     | 77,0              | 9,0               | 66                                              |
|        | month  | 12,2                 | 15,3              | 27,0    | 1,0     | 127,0             | 27,0              | 196                                             |
| June   | 1      | 18,7                 | 18,9              | 28,0    | 10,0    | 13,0              | 12,0              | 90                                              |
|        | 2      | 19,9                 | 20,8              | 32,0    | 9,0     | 3,5               | 12,0              | 110                                             |
|        | 3      | 20,7                 | 21,7              | 34,0    | 5,0     | 1,0               | 13,0              | 130                                             |
|        | month  | 19,8                 | 20,5              | 34,0    | 1,0     | 17,5              | 37,0              | 330                                             |
| July   | 1      | 19,3                 | 22,2              | 31,0    | 11,0    | 24,0              | 13,0              | 100                                             |
|        | 2      | 25,8                 | 21,7              | 35,0    | 15,0    | 0                 | 13,0              | 180                                             |
|        | 3      | 22,6                 | 22,3              | 32,0    | 11,0    | 16,0              | 13,0              | 143                                             |
|        | month  | 22,6                 | 22,1              | 35,0    | 11,0    | 40,0              | 39,0              | 423                                             |
| August | 1      | 24,6                 | 21,5              | 34,0    | 15,0    | 0                 | 11                | 180                                             |
|        | 2      | 23,0                 | 20,1              | 35,0    | 8,0     | 0                 | 10                | 190                                             |
|        | 3      | 24,8                 | 18,5              | 35,0    | 12,0    | 0                 | 11                | 231                                             |
|        | month  | 24,1                 | 20,5              | 35,0    | 8,0     | 0                 | 32                | 601                                             |
| TOTAL  |        | x                    | x                 | 35,0    | 1,0     | 184,5             | 128               | 1550                                            |

Table S2. Duration of interstage periods at growing season of spring wheat cultivars in 2022

| Cultivar                      | Interstage periods, days |                      |                      |                     |                   |                       |                                |                                     |                                        |                                            |
|-------------------------------|--------------------------|----------------------|----------------------|---------------------|-------------------|-----------------------|--------------------------------|-------------------------------------|----------------------------------------|--------------------------------------------|
|                               | Sowing - seedlings       | Seedlings - 3rd leaf | 3rd leaf - tillering | Tillering - booting | Booting - heading | Heading – milky stage | Milky stage - soft dough stage | Soft dough stage - hard dough stage | Hard dough stage - full ripening stage | Growing season (seedlings - full ripeness) |
| <b>Plowing</b>                |                          |                      |                      |                     |                   |                       |                                |                                     |                                        |                                            |
| Uchitel                       | 12                       | 12                   | 5                    | 12                  | 16                | 14                    | 7                              | 15                                  | 4                                      | 85                                         |
| Tulaikovskaya zolotaya        | 12                       | 12                   | 5                    | 12                  | 17                | 13                    | 7                              | 17                                  | 6                                      | 89                                         |
| Orenburgskaya 30              | 12                       | 12                   | 5                    | 12                  | 17                | 13                    | 7                              | 16                                  | 4                                      | 86                                         |
| Ulyanovskaya 105              | 12                       | 13                   | 6                    | 14                  | 19                | 14                    | 6                              | 13                                  | 6                                      | 91                                         |
| Orenburgskaya 10              | 12                       | 12                   | 5                    | 12                  | 17                | 15                    | 7                              | 14                                  | 5                                      | 87                                         |
| Bezenchukskaya 210            | 12                       | 12                   | 5                    | 12                  | 16                | 15                    | 7                              | 14                                  | 7                                      | 88                                         |
| <b>Nonmoldboard loosening</b> |                          |                      |                      |                     |                   |                       |                                |                                     |                                        |                                            |
| Uchitel                       | 12                       | 12                   | 5                    | 12                  | 16                | 14                    | 7                              | 15                                  | 4                                      | 85                                         |
| Tulaikovskaya zolotaya        | 12                       | 12                   | 5                    | 12                  | 17                | 13                    | 8                              | 17                                  | 6                                      | 90                                         |
| Orenburgskaya 30              | 12                       | 12                   | 5                    | 12                  | 17                | 13                    | 7                              | 16                                  | 4                                      | 86                                         |
| Ulyanovskaya 105              | 12                       | 13                   | 6                    | 14                  | 19                | 14                    | 6                              | 13                                  | 6                                      | 91                                         |
| Orenburgskaya 10              | 12                       | 12                   | 5                    | 12                  | 17                | 15                    | 7                              | 14                                  | 5                                      | 87                                         |
| Bezenchukskaya 210            | 12                       | 12                   | 5                    | 12                  | 16                | 15                    | 7                              | 14                                  | 7                                      | 88                                         |

|                   |                           |                        |         |            |
|-------------------|---------------------------|------------------------|---------|------------|
| First sowing date | Orenburgskaya 10          | Fallow                 | 10 ears | 45 kernels |
|                   |                           | Nonmoldboard loosening | 10 ears | 45 kernels |
|                   |                           | Plowing                | 10 ears | 45 kernels |
|                   | Orenburgskaya 30          | Fallow                 | 10 ears | 45 kernels |
|                   |                           | Nonmoldboard loosening | 10 ears | 45 kernels |
|                   |                           | Plowing                | 10 ears | 45 kernels |
|                   | Ulyanovskaya 105          | Fallow                 | 10 ears | 45 kernels |
|                   |                           | Nonmoldboard loosening | 10 ears | 45 kernels |
|                   |                           | Plowing                | 10 ears | 45 kernels |
|                   | Bezenchukskaya 210        | Fallow                 | 10 ears | 45 kernels |
|                   |                           | Nonmoldboard loosening | 10 ears | 45 kernels |
|                   |                           | Plowing                | 10 ears | 45 kernels |
|                   | Tulaikovskaya zolotistaya | Fallow                 | 10 ears | 45 kernels |
|                   |                           | Nonmoldboard loosening | 10 ears | 45 kernels |
|                   |                           | Plowing                | 10 ears | 45 kernels |
|                   | Uchitel                   | Fallow                 | 10 ears | 45 kernels |
|                   |                           | Nonmoldboard loosening | 10 ears | 45 kernels |
|                   |                           | Plowing                | 10 ears | 45 kernels |

**Figure S1.** Evaluation schema of the kernel indicators depending on cultivar and tillage practice.

|                    |                            |         |         |            |
|--------------------|----------------------------|---------|---------|------------|
| First sowing date  | Ulyanovskaya 105           | Plowing | 10 ears | 45 kernels |
|                    | Bezenchukskaya zolotistaya | Plowing | 10 ears | 45 kernels |
|                    | Luch 25                    | Fallow  | 10 ears | 45 kernels |
|                    | Orenburgskaya 10           | Fallow  | 10 ears | 45 kernels |
| Second sowing date | Ulyanovskaya 105           | Plowing | 10 ears | 45 kernels |
|                    | Bezenchukskaya zolotistaya | Plowing | 10 ears | 45 kernels |
|                    | Luch 25                    | Fallow  | 10 ears | 45 kernels |
|                    | Orenburgskaya 10           | Fallow  | 10 ears | 45 kernels |

**Figure S2.** Evaluation schema of the kernel indicators depending on the sowing date, cultivar and tillage practice.
